# Supplementary material for: Self-Healable Biocomposites Crosslinked with a Combination of Silica and Quercetin
Source: MDPI journal article supplement (doi:10.3390/ma14144028), 2021-07-19
Supplement: s1 [file s1]

# Self-Healable Biocomposites Crosslinked with a Combination of Silica and Quercetin

Olga Olejnik <sup>1</sup>, Anna Masek <sup>1,\*</sup> and Małgorzata Iwona Szynkowska-Jóźwik <sup>2</sup>

<sup>1</sup> Institute of Polymer and Dye Technology, Faculty of Chemistry, Lodz University of Technology, Stefanowskiego 12/16, 90-924 Lodz, Poland; olejnik.olga@dokt.p.lodz.pl

<sup>2</sup> Institute of General and Ecological Chemistry, Faculty of Chemistry, Lodz University of Technology, Żeromskiego 116, 90-924 Lodz, Poland; malgorzata.szynkowska@p.lodz.pl

\* Correspondence: anna.masek@p.lodz.pl

**Table S1.** Tensile strength (TS) results of pristine ENR-50-based composites and the same materials after 2 days, 4 days of self-healing without any external stimuli and after 4 days of self-healing with extra 20 minutes of heating.

| Sample                  | TS <sub>pristine</sub><br>[MPa] | TS <sub>after 2 days of</sub><br>self-healing<br>[MPa] | TS <sub>after 4 days of</sub><br>self-healing<br>[MPa] | TS <sub>after 4 days of</sub><br>self-healing and<br>20 min of heating<br>[MPa] |
|-------------------------|---------------------------------|--------------------------------------------------------|--------------------------------------------------------|---------------------------------------------------------------------------------|
| ENR                     | 0.262 ± 0.014                   | 0.21 ± 0.02                                            | 0.208 ± 0.014                                          | -                                                                               |
| ENR/quercetin22         | 0.61 ± 0.14                     | 0.35 ± 0.07                                            | 0.38 ± 0.02                                            | 0.31 ± 0.08                                                                     |
| ENR/quercetin4          | 1.04 ± 0.10                     | 0.33 ± 0.08                                            | 0.36 ± 0.09                                            | 0.6 ± 0.5                                                                       |
| ENR/silica15            | 2.3 ± 0.2                       | 0.38 ± 0.04                                            | 0.52 ± 0.07                                            | 0.295 ± 0.012                                                                   |
| ENR/quercetin2/silica15 | 3.3 ± 0.2                       | 1.5 ± 0.6                                              | 1.3 ± 0.6                                              | 1.4 ± 0.3                                                                       |
| ENR/quercetin4/silica15 | 3.8 ± 0.5                       | 1.1 ± 0.5                                              | 1.4 ± 0.3                                              | 1.3 ± 0.5                                                                       |
| ENR/DCP2                | 4.6 ± 0.2                       | 0.4 ± 0.2                                              | 0.37 ± 0.03                                            | 0.6 ± 0.2                                                                       |

**Table S2.** Elongation at break (Eb) results of pristine ENR-50-based composites and the same materials after 2 days, 4 days of self-healing without any external stimuli and after 4 days of self-healing with extra 20 minutes of heating.

| Sample                  | Eb <sub>pristine</sub> [%] | Eb <sub>after 2 days of</sub><br>self-healing [%] | Eb <sub>after 4 days of</sub><br>self-healing [%] | Eb <sub>after 4 days of</sub><br>self-healing and<br>20 min of heating<br>[%] |
|-------------------------|----------------------------|---------------------------------------------------|---------------------------------------------------|-------------------------------------------------------------------------------|
| ENR                     | 1170 ± 90                  | 80 ± 20                                           | 90 ± 30                                           | -                                                                             |
| ENR/quercetin22         | 800 ± 150                  | 300 ± 200                                         | 370 ± 90                                          | 240 ± 150                                                                     |
| ENR/quercetin4          | 770 ± 50                   | 90 ± 60                                           | 130 ± 70                                          | 300 ± 300                                                                     |
| ENR/silica15            | 910 ± 80                   | 40 ± 20                                           | 150 ± 70                                          | 70 ± 60                                                                       |
| ENR/quercetin2/silica15 | 620 ± 30                   | 280 ± 140                                         | 250 ± 120                                         | 250 ± 90                                                                      |
| ENR/quercetin4/silica15 | 510 ± 60                   | 164 ± 104                                         | 200 ± 50                                          | 160 ± 80                                                                      |
| ENR/DCP2                | 830 ± 20                   | 50 ± 20                                           | 48 ± 8                                            | 140 ± 70                                                                      |
